# Supplementary material for: Green Synthesis of Engineered CdS Nanoparticles with Reduced Cytotoxicity for Enhanced Bioimaging Application
Source: PubMed Central journal article supplement — ACS Omega. 2021 Mar 17;6(12):8646–55. doi: 10.1021/acsomega.1c00519 (PMC8015075; doi:10.1021/acsomega.1c00519), 2021-03-17
Supplement: ao1c00519_si_001.pdf [file ao1c00519_si_001.pdf]

# Green synthesis of engineered CdS nanoparticles with reduced cytotoxicity for enhanced bio-imaging application

N Susha<sup>1</sup>, Prajit Janardhanan<sup>2</sup>, Rajendra Pilankatta<sup>2</sup> and Swapna S Nair<sup>1\*</sup>.

<sup>1</sup>Department of Physics, Central University of Kerala, Kasaragod, INDIA.

<sup>2</sup>Department of Biochemistry and Molecular Biology, Central University of Kerala, Kasaragod, INDIA.

## Supporting Information

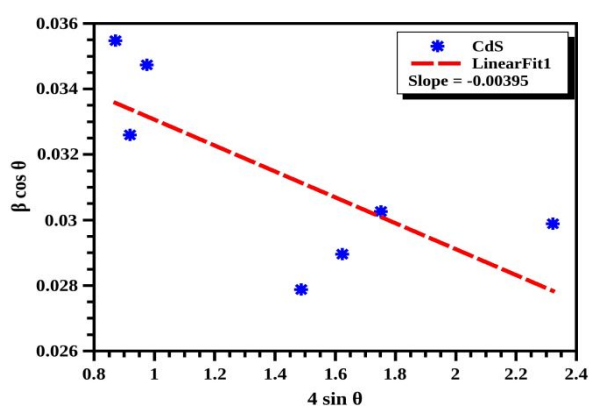

Figure S1: W-H plot of CdS nanoparticle.

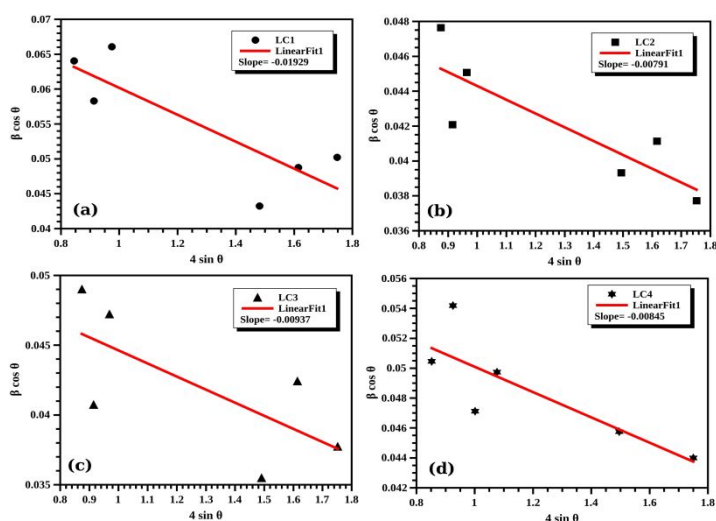

Figure S2: W-H plot of CdS-C. Odorata hybrid structures (a) LC1, (b) LC2, (c) LC3 and (d) LC4

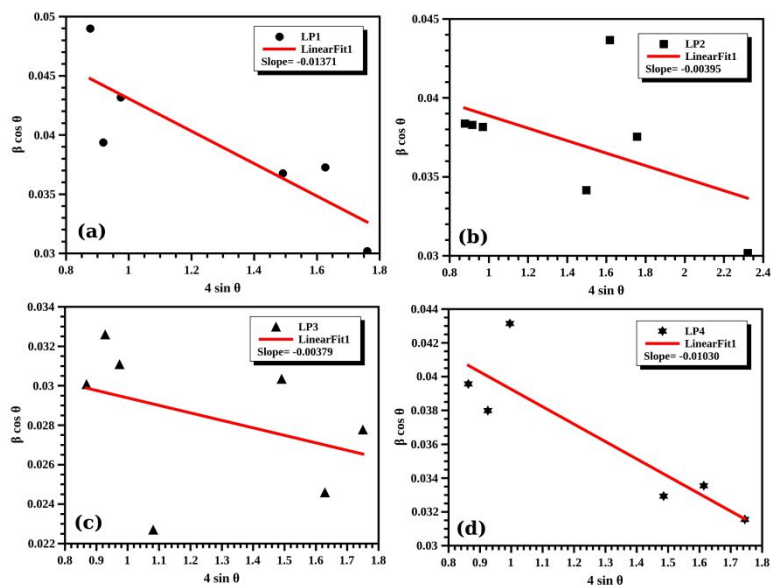

Figure S3: W-H plot of CdS-*P. Amboinicus* hybrid structures, (a) LP1, (b) LP2, (c) LP3 and (d) LP4

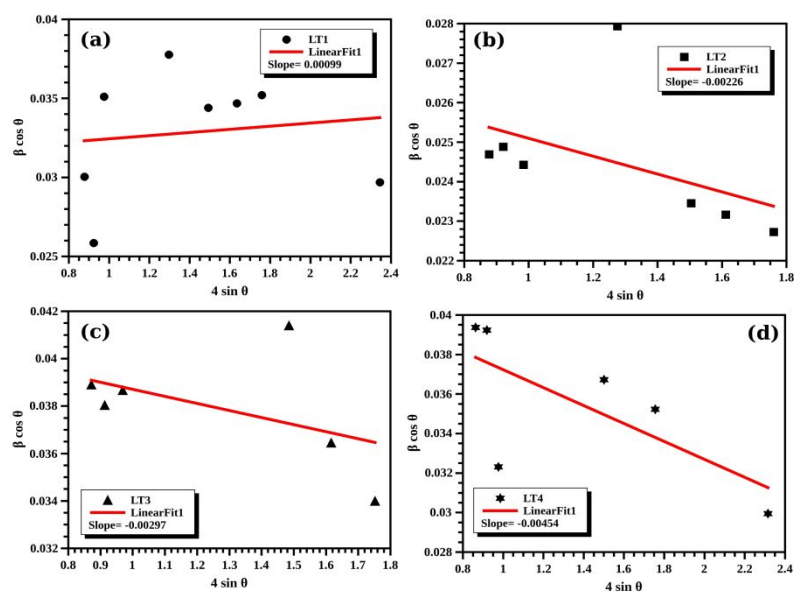

Figure S4: W-H plot of CdS-*O. Tenuiflorum* hybrid structures, (a) LT1, (b) LT2, (c) LT3 and (d) LT4.

Table S1: Sample details with % of leaf extract solution(*C. Odorata* (C), *P. amboinicus* (P) and *O. tenuiflorum* (T)), calculated lattice parameters and the crystallite size from XRD and W-H analysis

| Sample Name | Total volume of leaf extract (%) | Crystallite size (Å) | Strain   | Size from W-H Analysis (Å) | a (Å) | c (Å) |
|-------------|----------------------------------|----------------------|----------|----------------------------|-------|-------|
| CdS         | 0                                | 45                   | -0.00395 | 37                         | 4.09  | 6.70  |
| LC1         | 6                                | 26                   | -0.01929 | 18                         | 4.14  | 6.75  |
| LC2         | 10                               | 33                   | -0.00791 | 27                         | 4.08  | 6.73  |
| LC3         | 20                               | 33                   | -0.00937 | 26                         | 4.08  | 6.70  |
| LC4         | 50                               | 29                   | -0.00845 | 24                         | 4.11  | 6.65  |
| LP1         | 6                                | 36                   | -0.01317 | 24                         | 4.07  | 6.71  |
| LP2         | 10                               | 38                   | -0.00395 | 32                         | 4.07  | 6.73  |
| LP3         | 20                               | 49                   | -0.00379 | 42                         | 4.09  | 6.63  |
| LP4         | 50                               | 38                   | -0.01030 | 28                         | 4.11  | 6.65  |
| LT1         | 6                                | 43                   | 0.00099  | 45                         | 4.07  | 6.67  |
| LT2         | 10                               | 57                   | -0.00226 | 51                         | 4.06  | 6.69  |
| LT3         | 20                               | 37                   | -0.00297 | 34                         | 4.11  | 6.76  |
| LT4         | 50                               | 39                   | -0.00454 | 33                         | 4.09  | 6.69  |

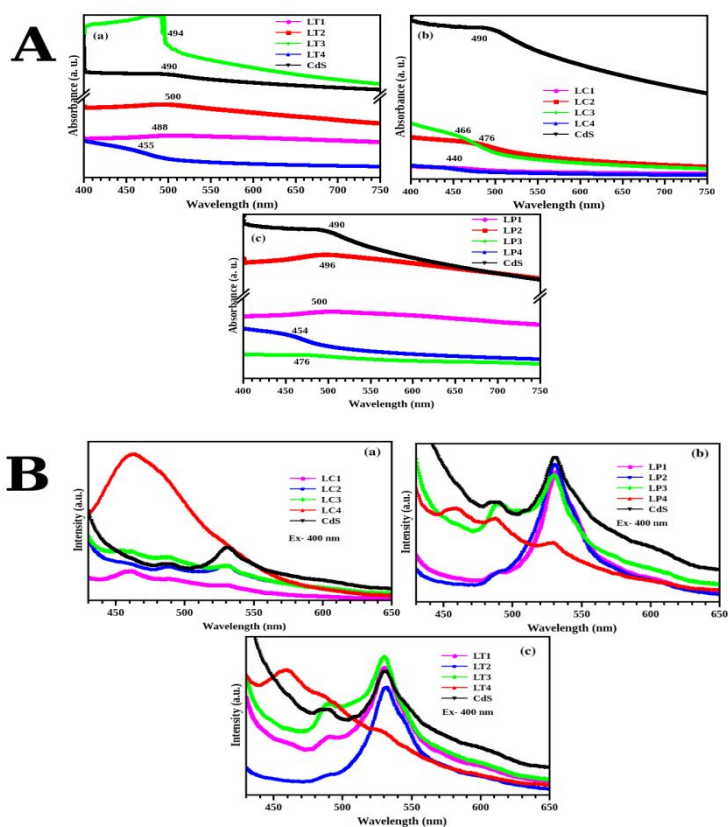

Figure S5: (A) Absorption spectra of the (a) CdS-C. odorata (b) CdS-P. amboinicus and (c) CdS-O. tenuiflorum hybrid structures in comparison with the CdS nanoparticles (B) Emission spectra of all the CdS-GS extract hybrid at an excitation of 400 nm (a) LC series (b) LP series and (c) LT series.

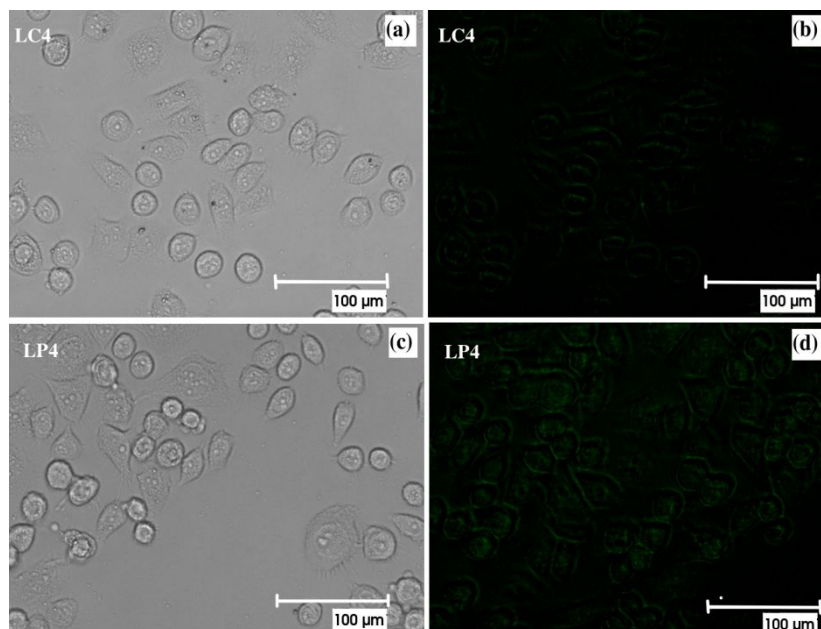

Figure S6: Bright field and fluorescent images of the cell with the presence of CdS- *C.Odorata* (a,b) and that of CdS- *P. Amboinicus* (c,d).
